# Supplementary material
Source: publisher figshare collection journal article supplement (https://diabetesjournals.figshare.com/ndownloader/files/28381725)
Supplement: Supplementary file 1 [file 28381725]

## Sheet: UP_Dev_vs_Healthy
Table X-1. Upregulated KEGG Pathways of Development vs Healthy Adult Group (q-val < 0.05)
Pathway	Geometric Mean	Mean	p-value	q-value	Gene Set Size
mmu04512 ECM-receptor interaction	3.27748e-09	6.20886	3.27748e-09	6.81715e-07	84
mmu04510 Focal adhesion	2.47639e-08	5.5796	2.47639e-08	2.57544e-06	192
mmu04610 Complement and coagulation cascades	4.55806e-05	4.03301	4.55806e-05	0.00316025	70
mmu04360 Axon guidance	6.52383e-05	3.88719	6.52383e-05	0.00339239	127
mmu05144 Malaria	8.53409e-05	3.9653	8.53409e-05	0.00355018	38
mmu05146 Amoebiasis	0.000125714	3.74337	0.000125714	0.00435808	97
mmu05200 Pathways in cancer	0.000150894	3.63534	0.000150894	0.00448371	299
mmu04110 Cell cycle	0.000244982	3.53414	0.000244982	0.00636953	122
mmu04060 Cytokine-cytokine receptor interaction	0.000512463	3.30831	0.000512463	0.0118436	198
mmu04350 TGF-beta signaling pathway	0.000572653	3.31391	0.000572653	0.0119112	80
mmu04670 Leukocyte transendothelial migration	0.000812158	3.1926	0.000812158	0.0153572	108
mmu04640 Hematopoietic cell lineage	0.00194716	2.93253	0.00194716	0.0337507	76
mmu04340 Hedgehog signaling pathway	0.00268061	2.8538	0.00268061	0.0417817	47
mmu05217 Basal cell carcinoma	0.00281223	2.83438	0.00281223	0.0417817	49

## Sheet: DOWN_Dev_vs_Healthy
Table X-2. Downregulated KEGG Pathways of Development vs Healthy Adult Group (q-val < 0.05)
Pathway	Geometric Mean	Mean	p-value	q-value	Gene Set Size
mmu04141 Protein processing in endoplasmic reticulum	6.17322e-06	-4.46997	6.17322e-06	0.00128403	156

## Sheet: UP_T1D_vs_Healthy
Table X-3. Upregulated KEGG Pathways of T1D vs Healthy Adult Group (q-val < 0.05)
Pathway	Geometric Mean	Mean	p-value	q-value	Gene Set Size
mmu04060 Cytokine-cytokine receptor interaction	2.27783e-11	6.8316	2.27783e-11	4.73789e-09	198
mmu04145 Phagosome	2.98091e-10	6.45289	2.98091e-10	2.90991e-08	149
mmu05150 Staphylococcus aureus infection	4.19699e-10	7.24162	4.19699e-10	2.90991e-08	44
mmu05332 Graft-versus-host disease	6.34437e-10	7.18454	6.34437e-10	3.29907e-08	37
mmu05330 Allograft rejection	4.60977e-09	6.78613	4.60977e-09	1.91766e-07	34
mmu04514 Cell adhesion molecules (CAMs)	6.03264e-09	5.94612	6.03264e-09	2.09131e-07	128
mmu04612 Antigen processing and presentation	4.18835e-08	5.81437	4.18835e-08	1.24454e-06	61
mmu05140 Leishmaniasis	5.98966e-08	5.74606	5.98966e-08	1.55731e-06	61
mmu05320 Autoimmune thyroid disease	2.81574e-07	5.66357	2.81574e-07	6.50749e-06	36
mmu04380 Osteoclast differentiation	3.6852e-07	5.13008	3.6852e-07	7.66522e-06	110
mmu05416 Viral myocarditis	4.40168e-07	5.20778	4.40168e-07	8.25911e-06	71
mmu04062 Chemokine signaling pathway	4.76487e-07	5.02378	4.76487e-07	8.25911e-06	171
mmu05323 Rheumatoid arthritis	6.64294e-07	5.10813	6.64294e-07	1.06287e-05	75
mmu04672 Intestinal immune network for IgA production	1.32184e-06	5.16575	1.32184e-06	1.96387e-05	40
mmu04940 Type I diabetes mellitus	1.85428e-06	5.06912	1.85428e-06	2.57126e-05	44
mmu04620 Toll-like receptor signaling pathway	1.45613e-05	4.33925	1.45613e-05	0.000186704	84
mmu04650 Natural killer cell mediated cytotoxicity	1.52595e-05	4.29129	1.52595e-05	0.000186704	99
mmu05310 Asthma	2.83734e-05	4.91852	2.83734e-05	0.000327871	15
mmu05322 Systemic lupus erythematosus	3.57874e-05	4.19512	3.57874e-05	0.000391778	56
mmu04640 Hematopoietic cell lineage	3.89475e-05	4.08027	3.89475e-05	0.000405054	76
mmu05145 Toxoplasmosis	0.000165326	3.65366	0.000165326	0.00163751	118
mmu05144 Malaria	0.00032301	3.58771	0.00032301	0.00305392	38
mmu04670 Leukocyte transendothelial migration	0.000697556	3.24542	0.000697556	0.00630834	108
mmu04610 Complement and coagulation cascades	0.000792232	3.23936	0.000792232	0.00686601	70
mmu04623 Cytosolic DNA-sensing pathway	0.000906597	3.27738	0.000906597	0.00754289	41
mmu04662 B cell receptor signaling pathway	0.00094958	3.17009	0.00094958	0.00759664	74
mmu04621 NOD-like receptor signaling pathway	0.00121658	3.11227	0.00121658	0.00937217	55
mmu05142 Chagas disease (American trypanosomiasis)	0.00149119	3.01391	0.00149119	0.0110774	94
mmu05340 Primary immunodeficiency	0.00262012	2.92607	0.00262012	0.0187926	32
mmu04666 Fc gamma R-mediated phagocytosis	0.00279246	2.81384	0.00279246	0.0193611	85
mmu04630 Jak-STAT signaling pathway	0.00322349	2.74962	0.00322349	0.0216286	120

## Sheet: UP_T2D_vs_Healthy
Table X-4. Upregulated KEGG Pathways of T2D vs Healthy Adult Group (q-val < 0.05)
Pathway	Geometric Mean	Mean	p-value	q-value	Gene Set Size
mmu05150 Staphylococcus aureus infection	1.00722e-06	5.14336	1.00722e-06	0.000177016	44
mmu04145 Phagosome	1.70207e-06	4.73756	1.70207e-06	0.000177016	149
mmu04142 Lysosome	5.26808e-05	3.94531	5.26808e-05	0.00365254	119
mmu05140 Leishmaniasis	0.000331442	3.50001	0.000331442	0.017235	61
mmu04141 Protein processing in endoplasmic reticulum	0.000421751	3.38169	0.000421751	0.0175449	156
mmu05323 Rheumatoid arthritis	0.000663942	3.27497	0.000663942	0.022972	75
mmu05330 Allograft rejection	0.000825891	3.28177	0.000825891	0.022972	34
mmu04380 Osteoclast differentiation	0.000924509	3.1538	0.000924509	0.022972	110
mmu05332 Graft-versus-host disease	0.00103378	3.19659	0.00103378	0.022972	37
mmu05322 Systemic lupus erythematosus	0.00110442	3.14125	0.00110442	0.022972	56
mmu04610 Complement and coagulation cascades	0.00141233	3.05015	0.00141233	0.0267058	70
mmu04612 Antigen processing and presentation	0.00258272	2.84882	0.00258272	0.0404323	61
mmu05320 Autoimmune thyroid disease	0.00285274	2.85222	0.00285274	0.0404323	36
mmu05310 Asthma	0.00285457	2.99438	0.00285457	0.0404323	15
mmu00010 Glycolysis / Gluconeogenesis	0.00291579	2.81718	0.00291579	0.0404323	54
mmu04060 Cytokine-cytokine receptor interaction	0.0038295	2.68168	0.0038295	0.0463281	198
mmu04672 Intestinal immune network for IgA production	0.00407384	2.71822	0.00407384	0.0463281	40
mmu04514 Cell adhesion molecules (CAMs)	0.00417841	2.65908	0.00417841	0.0463281	128
mmu05144 Malaria	0.0042319	2.70593	0.0042319	0.0463281	38
